# Estradiol Stimulates Progesterone Synthesis in Hypothalamic Astrocyte Cultures

Paul E. Micevych, Victor Chaban, Julie Ogi, Phoebe Dewing, John K. H. Lu, and Kevin Sinchak

Department of Neurobiology, Laboratory of Neuroendocrinology of the Brain Research Institute, David Geffen School of Medicine at the University of California, Los Angeles, Los Angeles, California 90095

The brain synthesizes steroids *de novo*, especially progesterone. Recently estradiol has been shown to stimulate progesterone synthesis in the hypothalamus and enriched astrocyte cultures derived from neonatal cortex. Estradiol-induced hypothalamic progesterone has been implicated in the control of the LH surge. The present studies were undertaken to determine whether hypothalamic astrocytes derived from female neonatal or female postpubertal rats increased production of progesterone in response to an estradiol challenge. Estradiol induced progesterone synthesis in postpubertal astrocytes but not neonatal astrocytes. This estradiol action was blocked by the estrogen receptor antagonist ICI 182,780. Previously we had demonstrated that estradiol stimulates a rapid increase in free cytosolic  $\text{Ca}^{2+}$  ( $[\text{Ca}^{2+}]_i$ ) spikes in neonatal cortical astrocytes acting through a membrane estrogen receptor. We now report that estradiol also rapidly increased  $[\text{Ca}^{2+}]_i$  spikes in hypothalamic astrocytes. The membrane-impermeable estradiol-BSA construct also induced  $[\text{Ca}^{2+}]_i$  spikes. Both estradiol-BSA and estradiol were blocked by ICI 182,780. Depleting

intracellular  $\text{Ca}^{2+}$  stores prevented the estradiol-induced increased  $[\text{Ca}^{2+}]_i$  spikes, whereas removing extracellular  $\text{Ca}^{2+}$  did not prevent estradiol-induced  $[\text{Ca}^{2+}]_i$  spikes. Together these results indicate that estradiol acts through a membrane-associated receptor to release intracellular stores of  $\text{Ca}^{2+}$ . Thapsigargin, used to mimicked the intracellular release of  $\text{Ca}^{2+}$  by estradiol, increased progesterone synthesis, suggesting that estradiol-induced progesterone synthesis involves increases in  $[\text{Ca}^{2+}]_i$ . Estradiol treatment did not change levels of steroid acute regulatory protein, P450 side chain cleavage,  $3\beta$ -hydroxysteroid dehydrogenase, and sterol carrier protein-2 mRNAs as measured by quantitative RT-PCR, suggesting that *in vitro*, estradiol regulation of progesterone synthesis in astrocytes does not depend on transcription of new steroidogenic proteins. The present results are consistent with our hypothesis that estrogen-positive feedback regulating the LH surge involves stimulating local progesterone synthesis by hypothalamic astrocytes. (*Endocrinology* 148: 782–789, 2007)

RECENTLY WE PROPOSED that the *de novo* synthesis of progesterone in the hypothalamus (neuroprogesterone) is part of the mechanism that initiates the LH surge in rats. Estradiol produced by the ovary and peaking on the afternoon of proestrus acts on the hypothalamus to increase the *de novo* synthesis of progesterone to produce locally elevated levels of progesterone before the LH surge (1). Our hypothesis is that estrogen-positive feedback is mediated by the local synthesis of neuroprogesterone, which acts on estradiol-induced progesterone receptors in the hypothalamus to initiate the neural cascade leading to the surge release of LH from the anterior pituitary (1–3).

Steroidogenesis in the nervous system has been well established (for reviews, see Refs. 4–7). Specific cell types in the central nervous system (CNS) have been demonstrated to have particular biosynthetic pathways (8, 9). Neurons reportedly have the enzymes for primarily synthesizing estro-

gen, whereas oligodendrocytes preferentially produce pregnenolone (11; but see Ref. 10). According to this model, astrocytes may be the most active steroidogenic cells in the brain, expressing P450 side-chain cleavage (P450<sub>scc</sub>),  $3\beta$ -hydroxysteroid dehydrogenase ( $3\beta$ -HSD), and cytochrome P450 aromatase. Based on these results, astrocytes appear to preferentially synthesize pregnenolone and progesterone (9). Previously we demonstrated that estradiol increased progesterone synthesis in neonatal cortical astrocytes, indicating that peripheral estrogen regulated the synthesis of neurosteroids (2). In a parallel series of studies, neonatal cortical astrocytes were demonstrated to express estrogen receptor (ER)- $\alpha$  and ER $\beta$  mRNAs (12). Some of the ER proteins were also present in the membrane fraction and mediated membrane actions of estradiol (12). For example, estradiol, in a dose-dependent and stereo-specific manner, rapidly increased free intracellular calcium ( $[\text{Ca}^{2+}]_i$ ) that was inhibited by ICI 182,780, an ER antagonist. Membrane-impermeable  $17\beta$ -diol-6-one-6-carboxymethylxime-BSA (E-6-BSA) also rapidly induced  $[\text{Ca}^{2+}]_i$  transients. In a  $\text{Ca}^{2+}$ -free medium, estradiol continued to induce  $[\text{Ca}^{2+}]_i$  spikes, suggesting that intracellular stores of  $\text{Ca}^{2+}$  were involved. This was borne out when blockade of either phospholipase C (PLC) or inositol trisphosphate ( $\text{IP}_3$ ) receptor or depletion of intracellular  $\text{Ca}^{2+}$  stores prevented the estrogen-induced rise in  $[\text{Ca}^{2+}]_i$ . Thus, in astrocytes, estradiol acts via membrane-associated ER to rapidly increase  $[\text{Ca}^{2+}]_i$  through activation of the PLC- $\text{IP}_3$  pathway.

The present studies were undertaken to determine

## First Published Online November 9, 2006

Abbreviations:  $[\text{Ca}^{2+}]_i$ , free intracellular calcium; CNS, central nervous system; Ct, cycle threshold; DMSO, dimethylsulfoxide; E-6-BSA,  $17\beta$ -diol-6-one-6-carboxymethylxime-BSA; ER, estrogen receptor; GPCR, G protein-coupled receptor; HBSS, Hanks' balanced salt solution;  $3\beta$ -HSD,  $3\beta$ -hydroxysteroid dehydrogenase;  $\text{IP}_3$ , inositol trisphosphate; mGluR1, metabotropic glutamate receptor type 1; PKA, protein kinase A; PKC, protein kinase C; PLC, phospholipase C; P450<sub>scc</sub>, P450 side-chain cleavage; SCP-2, sterol carrier protein-2; StAR, steroidogenic acute regulatory protein.

*Endocrinology* is published monthly by The Endocrine Society (<http://www.endo-society.org>), the foremost professional society serving the endocrine community.

whether hypothalamic astrocytes synthesize progesterone in response to estradiol stimulation and whether this estradiol-induced progesterone synthesis involves an increase of  $[Ca^{2+}]_i$ , as has been described for steroidogenesis in peripheral tissues. Hypothalamic astrocytes from neonatal and postpubertal female rats were cultured, stimulated with estradiol, and resulting changes in progesterone synthesis and  $[Ca^{2+}]_i$  levels determined. Expression of proteins associated with steroidogenesis, steroidogenic enzymes, and steroid carrier proteins was assessed using quantitative RT-PCR. These results have been presented in preliminary form (13).

## Materials and Methods

### Primary cell cultures

Primary hypothalamic astrocyte cultures were established from Long-Evans female neonatal (d 0–2) or postpubertal rats (d 48–49; Charles River, Wilmington, MA). Hypothalamic tissues were enzymatically digested with trypsin and mechanically dissociated with a fire-polished glass Pasteur pipette. Cultures were grown for 7–10 d in DMEM/F12 (Mediatech, Inc., Herndon, VA) supplemented with 10% fetal bovine serum (Hyclone, Logan, UT) in a T75 flask at 37°C. Once grown to confluence, astrocyte cultures were purified from oligodendrocytes and microglia using a technique based on the method of McCarthy and de Vellis (55) and previously used in our laboratory (2). Flasks were shaken at 200 rpm at 37°C on an orbital shaker for at least 24 h to eliminate oligodendrocytes. After each shaking, the astrocyte-enriched cultures were replaced with fresh medium. Ten thousand astrocytes were replated into each well of a 24-well culture plate and allowed another 48 h *in vitro* before beginning experiments. To confirm the purity of the cultures, the presence of glial fibrillary acidic protein (Chemicon, Temecula, CA) in cultured cells was assayed by immunocytochemistry. Cultures were counterstained with Hoechst-3342 (10 mg/ml; Invitrogen Corp., Carlsbad, CA) to visualize all nuclei. Cultures routinely contained greater than 95% glial fibrillary acidic protein-positive cells.

Before drug treatment, all experimental astrocyte cultures were steroid starved in DMEM/F12 (supplemented with 5% charcoal-stripped fetal bovine serum) for 24 h. After steroid-starvation, the cultures were treated with cyclodextrin-encapsulated 17 $\beta$ -estradiol ( $10^{-9}$  to  $10^{-6}$  M; Sigma, St. Louis, MO), ICI 182,780 [ $1 \mu\text{M}$  in dimethylsulfoxide (DMSO); Tocris, Ellisville, MO], 17 $\beta$ -estradiol + ICI 182,780, or estradiol-free DMEM/F12 culture media for 48 h. Subsequently the conditioned media were collected, snap frozen, and stored at  $-80^\circ\text{C}$  until assayed for progesterone levels. In another experiment studying the role of intracellular  $Ca^{2+}$  in neuroprogesterone synthesis, steroid-starved astrocyte cultures were pretreated with thapsigargin ( $1 \mu\text{M}$  in DMSO; Tocris) for 1 h. The culture media were collected as above, and new media with estradiol or control (steroid-free DMEM/F12 culture media) were added and incubated for 48 h and then collected.

### Steroid RIA

Progesterone levels were quantified by RIA using a method modified from Abraham *et al.* (14; and as described in Ref. 15). Briefly, 0.8 ml of the sample with known amounts of tritiated steroids was extracted with 7 ml diethyl ether, and the extract was dried. The dried extract was dissolved in isooctane and applied to a Celite column (Sigma) for chromatographic separation of steroids. Fractions collected from the columns were dried and reconstituted in assay buffer. The 4-ml fraction contained both the radiolabeled and the immunoreactive progesterone. For routine analysis, progesterone was extracted from the astrocyte conditioned media (0.8 ml) with diethyl ether before the RIA. The mixture was thoroughly vortexed and placed in a dry ice/methanol bath until the aqueous phase was frozen. The ether phase containing progesterone was decanted into a glass test tube and ether evaporated under a nitrogen gas stream. Samples were reconstituted with 0.1 M PBS with 0.1% gelatin. Progesterone standards were prepared in 0.1 M PBS with 0.1% gelatin. The intraassay and interassay coefficients of variation were 5.7 and 7.2%, respectively. The presence of progesterone was verified by

gas chromatography/mass spectroscopy (5975 GC/MS system; Agilent Technologies, Palo Alto, CA; with EI/CI package, equipped with an HP1 16.2 m  $\times$  0.2 mm  $\times$  0.11  $\mu\text{m}$  column). Statistical significance was tested using a one-way ANOVA. Significant differences among means were determined using the Student-Newman-Keuls *post hoc* test. Differences were considered significant at the  $P \leq 0.05$  level.

### Intracellular $Ca^{2+}$ measurements

Astrocyte-enriched cultures were grown on poly-L-lysine (0.1 mg/ml; Sigma) coated 15-mm glass coverslips until confluent. Cells were steroid starved for 24 h before calcium imaging. Astrocytes were incubated for 45 min with a calcium indicator, fura-2AM ( $2 \mu\text{M}$ ; Molecular Probes, Eugene, OR), which was dissolved in DMSO and diluted in Hanks' balanced salt solution (HBSS; Mediatech) at 37°C before imaging. Coverslips were mounted in a RC-26 recording chamber on P-4 platform (Warner Instruments, Hamden, CT) and placed on stage of a Axiovert 100 TV inverted microscope (Zeiss, Thornwood, New York, NY). Cells were washed out twice from fura-2 and perfused with HBSS buffered with HEPES (20 mM) using a peristaltic pump (Rainin Instrument, Woburn, MA). Changes in the  $[Ca^{2+}]_i$  were imaged on the Attofluor ratio vision digital fluorescence microscopy system (Atto Instruments, Rockville, MD) as previously described (12). Fluorescent intensity at 505 nm with excitation of 334 and 380 nm was followed by videomicroscopy and analyzed using AttoFluor software. For calcium imaging, drugs were used in the following concentrations:  $10^{-7}$  M thapsigargin (Calbiochem, San Diego, CA);  $10^{-6}$  M ICI 182,786;  $10^{-9}$  to  $10^{-6}$  M cyclodextrin-encapsulated 17 $\beta$ -estradiol;  $10^{-6}$  M cyclodextrin-encapsulated 17 $\alpha$ -estradiol;  $1 \mu\text{M}$  1, 3, 5(10)-estratrien-3, E-6-BSA (Steraloids, Newport, RI). Stock solutions were prepared in DMSO, except estradiol, which was prepared fresh in HBSS. Final working concentrations were diluted in HBSS. To remove any free estradiol from the E-6-BSA solution, an aliquot was dissolved in 50 mM Tris-HCl (pH 8.5) and filtered, as described (12). The retained fraction was resuspended in Tris-HCl and used immediately.

### Quantitative RT-PCR analysis

mRNA levels were measured in postpubertal female rat astrocyte cultures by quantitative RT-PCR to determine whether estradiol increased the expression of steroidogenic enzymes, P450 $_{\text{scc}}$ , and 3 $\beta$ -HSD, or carrier proteins, sterol carrier protein-2 (SCP-2) and steroidogenic acute regulatory protein (Star). Total RNA was isolated from several cultures of Long-Evans postpubertal rat astrocytes using TRIZOL reagent (Invitrogen) as per the manufacturer's recommended protocol. The integrity of total RNA was confirmed by the presence of sharp bands corresponding to 18S and 28S rRNA when separated by electrophoresis on a 2% agarose gel. cDNA was synthesized from the total RNA in 20- $\mu\text{l}$  reactions using anchored oligo (dT)<sub>20</sub> primers and Superscript III RNase H<sup>-</sup> reverse transcriptase (Invitrogen). The reverse transcriptase was performed at 40°C for 15 min, 45°C for 15 min, 50°C for 15 min, and 55°C for 15 min. Real-time chemistry using SYBR Green was performed with primers specific to genes of interest provided in Table 1. Primers and probes were designed using Primer3 software (The Whitehead Institute, Boston, MA) and their specificity confirmed by a BLAST software-assisted search of a nonredundant nucleotide sequence database (National Library of Medicine, Bethesda, MD).

Experiments were conducted with an Mx3000P real-time PCR System (Stratagene, La Jolla, CA) using QuantiTect SYBR Green PCR master mix (QIAGEN, Valencia, CA). PCR conditions used for amplification were as follows: initial denaturation at 95°C for 15 min, 40 cycles of denaturation at 94°C for 15 sec, annealing at 54°C for 30 sec, and elongation at 72°C for 30 sec. Data were collected in real time at the end of each cycle. Negative controls, without reverse transcriptase, and water controls were included in each reaction. In addition to real-time and melting curve analysis of the reactions, amplified products were separated electrophoretically on 2% agarose gels with ethidium bromide, and visualized under UV light to confirm proper amplicon size and the absence of nonspecific products. All PCR products produced a single specific product.

Relative expression data were calculated according to the two  $\Delta$ -threshold relative quantification method (3, 16). Normalization of cycle threshold (Ct) values was performed by subtracting the  $\beta$ -actin Ct

TABLE 1. Primers specific to genes of interest

| Gene    | Accession no. | Primers for SYBR Green                                        |
|---------|---------------|---------------------------------------------------------------|
| P450scc | J05156        | FW: CAGCGGTTTCATCGACGC<br>RV: TCTGGAGGCATGTTGAGCA             |
| 3β-HSD  | M38178        | FW: CCTACCCAGGCAGACCATCC<br>RV: ATGATGCTCTTCCTCATGGCC         |
| StAR    | NM_031558     | FW: TCAGAGTAGCAGCTCCCTTGTGTTG<br>RV: CTCCAAATCCTGAAACGGGAATGC |
| SCP-2   | NM_138508     | FW: AGGGGATGGATTCAAGGC<br>RV: CACGAACCTCTCCCTTCC              |
| β-Actin | NM_031144     | FW: ATGAGCGGTCCGATGCC<br>RV: CAGCACTGTGTTGGCATAGAGG           |

FW, Forward; RV, reverse.

from the Ct values acquired for each sample from the gene of interest. To calculate the relative difference in the number of cycles between the samples, the average Ct value of the postpubertal hypothalamic samples was selected as a baseline. This number was subtracted from each of the Ct values that were previously normalized to β-actin. The relative difference between sample groups was calculated based on the difference in Ct values using 2<sup>−ΔΔCt</sup>. Because the selected region of the cDNA of interest doubles during each cycle, the relative amount of initial material was compared by raising 2 to the power of the value of the postnormalization- and postbaseline-adjusted cycle difference.

Results

Progesterone synthesis in neonatal vs. postpubertal hypothalamic astrocytes

Astrocyte primary cultures from both neonatal and postpubertal female rats were treated with estradiol (10<sup>−9</sup> to 10<sup>−6</sup> M) for 48 h to induce progesterone synthesis. Basal levels of progesterone were measured in the neonatal and postpubertal hypothalamic astrocyte cultures (Fig. 1A). Estradiol did not increase progesterone levels in neonatal hypothalamic astrocyte cultures, compared with the steroid-free DMEM/F12 group (df = 4,19; F = 2.8; P = 0.065). In postpubertal hypothalamic astrocyte cultures (10<sup>−9</sup> M and 10<sup>−8</sup> M), estradiol increased levels of progesterone above basal levels, but this increase was significant only at 10<sup>−6</sup> M estradiol (Fig. 1A; df = 4,39; F = 8.6; P < 0.05; Student-Newman-Keuls, P < 0.05).

To test whether estradiol-induced progesterone synthesis

was mediated through a classical ER, postpubertal astrocyte-enriched cultures were treated with an ER inhibitor, ICI 182,780, in the presence or absence of estradiol. ICI 182,780 blocked estradiol-induced progesterone synthesis (Fig. 1B; df = 3,12; F = 13.1; P < 0.001).

Estradiol-induced increase of [Ca<sup>2+</sup>]<sub>i</sub> in hypothalamic astrocytes

To determine whether estradiol could induce a [Ca<sup>2+</sup>]<sub>i</sub> spike in hypothalamic astrocytes, both neonatal and postpubertal astrocytes were imaged using fura-2AM. As previously observed in cortical astrocytes, estradiol induced a rapid [Ca<sup>2+</sup>]<sub>i</sub> spike in both neonatal and postpubertal astrocytes, *in vitro*. A typical example of the effect of 17β-estradiol (20 nM) on postpubertal hypothalamic astrocytes is shown in Fig. 2A. The ED<sub>50</sub> of the response was 15.9 nM. Estradiol stimulation produced a marked increase in [Ca<sup>2+</sup>]<sub>i</sub> in 74% of cells tested (n = 36, from seven different cultures). The mean maximum amplitude of the [Ca<sup>2+</sup>]<sub>i</sub> response to estradiol was 193.1 ± 14.2 nM in postpubertal hypothalamic astrocyte cultures. In neonatal cultures, the mean maximum amplitude was 235.0 ± 30.1 nM (n = 23). In postpubertal astrocytes, E-6-BSA (1 μM) mimicked the estrogen-induced [Ca<sup>2+</sup>]<sub>i</sub> spike with a mean amplitude of 174 ± 18.9 (n = 11), suggesting a membrane mediated estradiol effect on [Ca<sup>2+</sup>]<sub>i</sub> flux (Fig. 2, B and D). In Ca<sup>2+</sup>-free medium [chelated with 5 mM 1,2-bis(o-

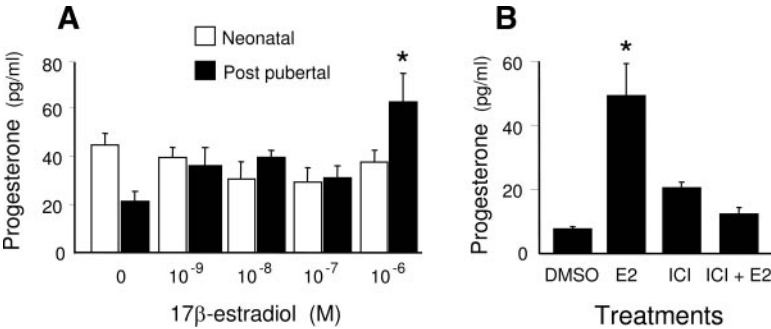

FIG. 1. Response of neonatal and postpubertal astrocytes *in vitro* to estradiol stimulation. A, Cells were steroid starved for 24 h and then incubated for 48 h with indicated concentrations of 17β-estradiol or 17β-estradiol-free media (0). Levels of progesterone in the supernatants were measured by RIA. Neonatal astrocytes did not increase progesterone levels in the media in response to any estradiol dose tested. Postpubertal astrocytes increased progesterone levels after treatment with estradiol. This increase was statistically significant at 10<sup>−6</sup> M 17β-estradiol. Values are reported as mean ± SEM (n = 8). \*, P < 0.05 (Student-Newman-Keuls), compared with 0 17β-estradiol. B, 17β-Estradiol (E2; 10<sup>−6</sup> M) induction of progesterone levels in media from primary postpubertal hypothalamic astrocyte cultures from female rats. Steroid-starved astrocytes were incubated for 48 h with E2-free media containing DMSO, E2, ER antagonist ICI 182,780 (ICI, dissolved in DMSO), and ICI + E2. Levels of progesterone in the supernatants were measured by RIA. Data are mean ± SEM (n = 4). \*, Values significantly greater than all other treatment groups (P < 0.05, Student-Newman-Keuls).



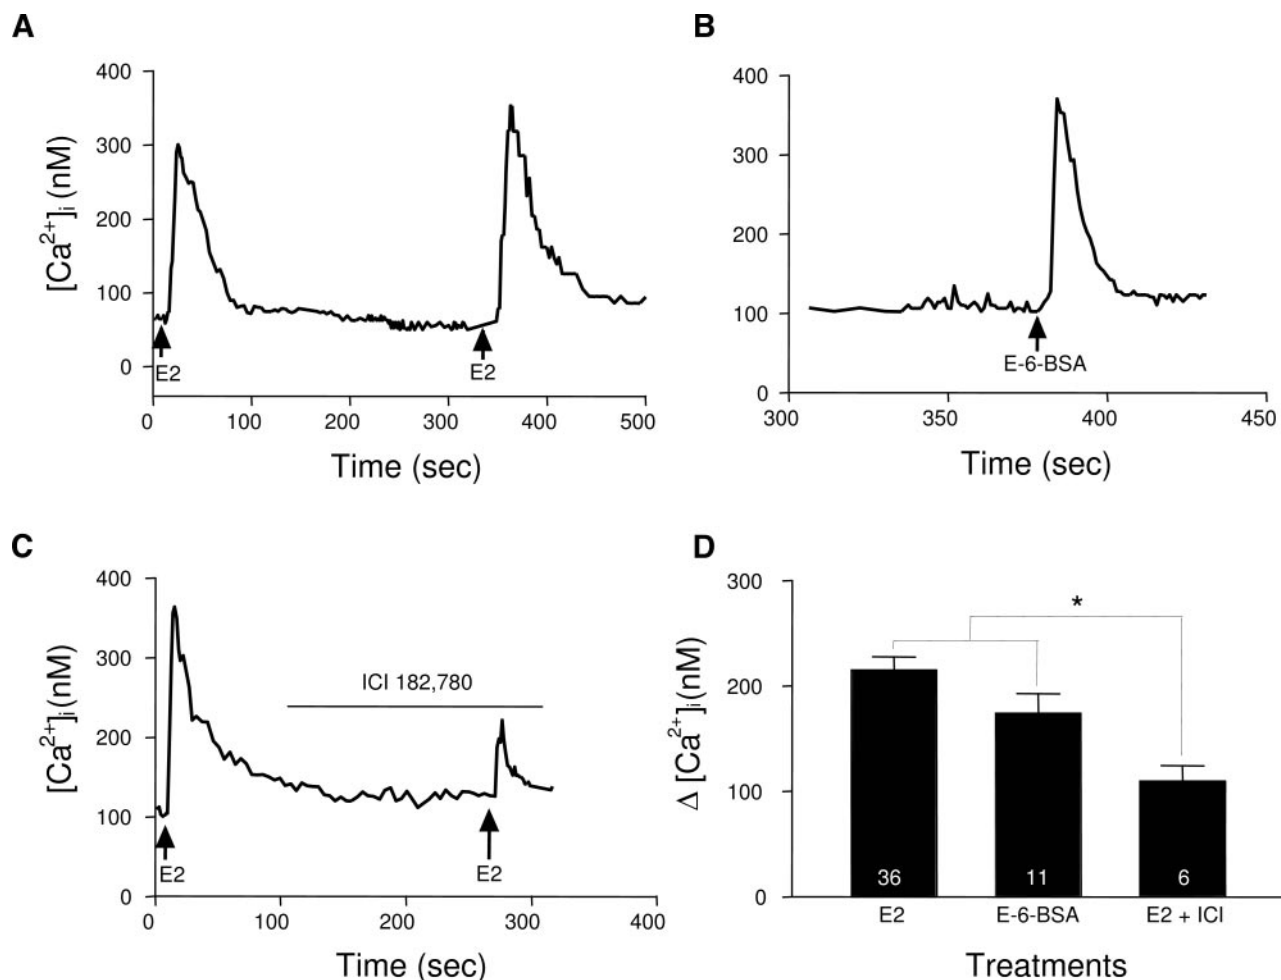

FIG. 2.  $17\beta$ -Estradiol (E2;  $10^{-8}$  M) induced  $[Ca^{2+}]_i$  response in astrocyte-enriched cultures from postpubertal female rats measured by  $Ca^{2+}$  imaging fluorescent digital microscopy. A, Changes in  $[Ca^{2+}]_i$  (nM) after E2 bath stimulation. E2 rapidly induced a  $[Ca^{2+}]_i$  spike that could be reactivated after a 5-min washout period after the initial E2 treatment. B, Real-time changes in  $[Ca^{2+}]_i$  after bath application of E-6-BSA ( $10^{-6}$  M). E-6-BSA treatment mimicked the E2-induced  $[Ca^{2+}]_i$  spike, indicating that estrogen interacted with ERs associated with the plasma membrane. C, Real-time changes in  $[Ca^{2+}]_i$  of astrocytes treated with ICI 182,780 ( $10^{-6}$  M) and E2 ( $10^{-8}$  M). Pretreatment with ICI 182,780 inhibited the E2-induced  $[Ca^{2+}]_i$  spike. D, Mean changes in  $[Ca^{2+}]_i$  of astrocytes treated with E2, E-6-BSA, or E2 + ICI 182,780. The E2- and E-6-BSA-induced  $[Ca^{2+}]_i$  were equivalent, and the E2-induced  $[Ca^{2+}]_i$  was significantly reduced with pretreatment with ICI 182,780. The number of observations is indicated in each column. \*, Significantly greater than E2 + ICI ( $P < 0.05$ ).

aminophenoxy)ethane-*N,N,N',N'*-tetraacetic acid], estradiol produced similar responses to those observed in  $Ca^{2+}$ -containing medium, indicating that the  $[Ca^{2+}]_i$  spikes were produced through the release of intracellular stores of  $Ca^{2+}$  as previously reported with cortical astrocytes (12).

To determine whether the ER mediating these rapid actions of estradiol was similar to the classic intracellular ERs, we tested  $17\alpha$ -estradiol, which did not stimulate  $[Ca^{2+}]_i$  spikes (data not shown). Furthermore, the estradiol effect was blocked by 1  $\mu$ M ICI 182,780 (Fig. 2, C and D). Together, these effects suggest that estradiol action is through a membrane associated receptor with the pharmacology of a classic ER.

#### Thapsigargin-induced progesterone synthesis in astrocyte cultures

Treatment of postpubertal astrocytes with thapsigargin, which rapidly releases IP<sub>3</sub>-sensitive intracellular  $Ca^{2+}$  stores, such as those in the smooth endoplasmic reticulum, induced

$[Ca^{2+}]_i$  spikes that resembled the spikes induced by estradiol (Fig. 3A). A 1-h application of thapsigargin significantly increased levels of progesterone, compared with control (Fig. 3B;  $df = 5,23$ ;  $F = 6.9$ ;  $P < 0.001$ ). In cultures incubated with estradiol and thapsigargin for 1 h, no further increase was observed (Fig. 3B; Student-Newman-Keuls,  $P < 0.05$ ). In cultures in which the media were changed after an hour of thapsigargin incubation and then incubated for another 48 h in fresh media with or without estradiol, progesterone levels in the supernatant did not increase significantly (Fig. 3B; Student-Newman-Keuls,  $P > 0.05$ ).

#### Expression of mRNAs coding for proteins associated with progesterone steroidogenesis

Steroidogenesis requires the conversion of cholesterol to pregnenolone through the action of the C27 cholesterol side chain cleavage cytochrome P450 enzyme (P450<sub>scc</sub>) that is located on the inner mitochondrial membrane. The first step

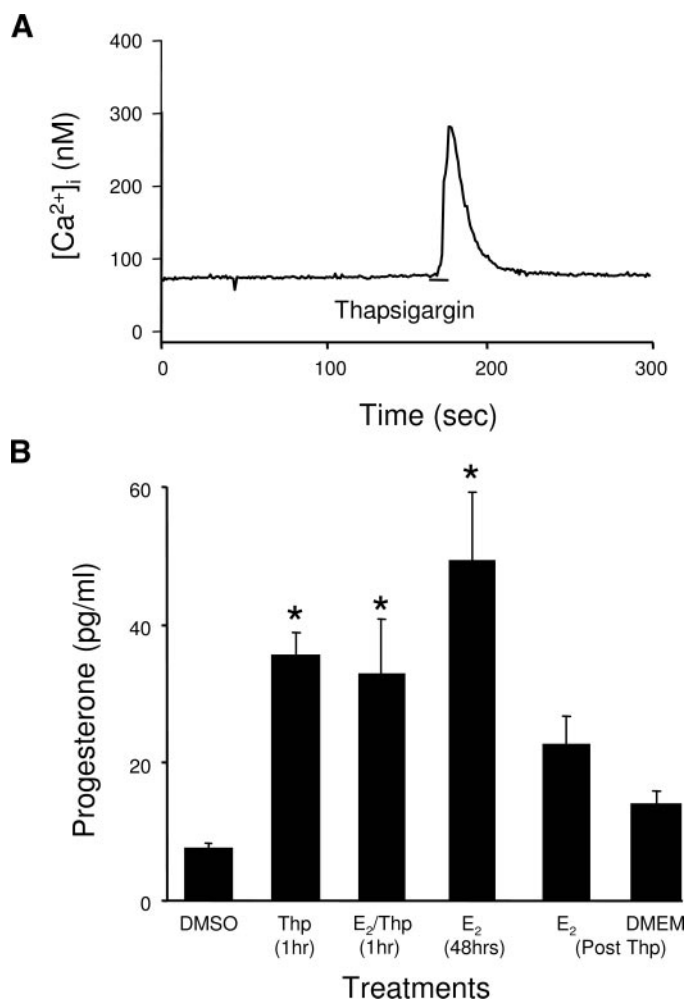

**FIG. 3.** The effects of thapsigargin on induction of  $[Ca^{2+}]_i$  spikes and progesterone synthesis in postpubertal hypothalamic astrocytes from female rats. **A**, Real-time changes in  $[Ca^{2+}]_i$  levels in astrocytes after treatment with thapsigargin ( $10^{-7}$  M). Treatment with thapsigargin, a potent inhibitor of  $Ca^{2+}$ -ATPase, depleted intracellular  $Ca^{2+}$  stores. Stimulation with thapsigargin induced an increase of  $[Ca^{2+}]_i$  that was similar to that of estradiol. **B**, Effect of thapsigargin on progesterone synthesis in astrocyte cultures obtained from postpubertal female rats. Astrocytes were treated with thapsigargin (Thp) or Thp ( $10^{-7}$  M) supplemented with  $10^{-6}$  M estradiol (E<sub>2</sub>/Thp) for 1 h. Media were collected and replaced with either estradiol-free DMEM/F12 (DMEM Post Thp) or  $10^{-6}$  M estradiol (E<sub>2</sub> 48 h Post Thp). The progesterone concentration in the supernatant significantly increased after 48 h treatment with E<sub>2</sub> or an hour of Thp or Thp + E<sub>2</sub>. When the media were replaced with DMEM/F12 (DMEM) after Thp treatment, there was no increase of progesterone concentration above baseline. After an hour of Thp treatment, 48 h of E<sub>2</sub> did not statistically increase the concentration of progesterone in the supernatant. Data are mean  $\pm$  SEM ( $n = 4$ ). \*, Values significantly different ( $P < 0.05$ ), compared with the control media, DMEM + DMSO.

in steroidogenesis is the delivery of cholesterol to the mitochondrion mediated by SCP-2 (17), in which it is then shuttled to the inner membrane by StAR (18). Pregnenolone is converted to progesterone by  $3\beta$ -HSD in the smooth endoplasmic reticulum (19–22). In the ovary, StAR-mediated transport is the rate-limiting step of steroidogenesis (reviewed in Ref. 19). Because estradiol induced progesterone synthesis in postpubertal astrocytes, only these cells were

used to measure estradiol effects on mRNA levels of genes coding for proteins involved in steroidogenesis in these cells. Interestingly, estradiol treatment did not increase P450scc,  $3\beta$ -HSD, StAR, or SCP-2 mRNA levels, compared with control cultures sampled at 24 and 48 h as measured by RT-PCR (one-way ANOVA effect of treatment  $P = 0.579$ ,  $df = 1,8$ ,  $F = 0.334$ ;  $P = 0.899$ ,  $df = 1,8$ ,  $F = 0.0175$ ;  $P = 0.500$ ,  $df = 1,8$ ,  $F = 0.500$ ;  $P = 0.177$ ,  $df = 1,8$ ,  $F = 2.190$ , respectively).

## Discussion

The major findings of the present experiments are that estradiol induced progesterone synthesis in cultured postpubertal hypothalamic astrocytes and that this stimulation was mediated through an increase in  $[Ca^{2+}]_i$ . Interestingly, a basal level of progesterone was present in media from cultured neonatal astrocytes, but only postpubertal astrocytes responded to estradiol with increased progesterone levels. These data suggest that estradiol-induced progesterone synthesis in astrocytes is developmentally regulated. The response of postpubertal astrocytes *in vitro* was similar to adult hypothalamus that had been treated with estradiol *in vivo* (1). In both experiments, estradiol increased progesterone synthesis. The present observations are also consistent with hypothalamic nonresponsiveness to estradiol-positive feedback before puberty (23, 24). Why neonatal hypothalamic astrocytes do not respond to estradiol stimulation is presently not clear. Quantitative RT-PCR identified mRNAs for progesterone synthesis-associated proteins in cultured neonatal astrocytes and measurement of progesterone in neonatal astrocyte conditioned media indicate that these cells are capable of synthesizing progesterone. Although neonatal astrocytes did not respond to estradiol stimulation by increasing progesterone synthesis, estradiol did induce  $[Ca^{2+}]_i$  spikes. Both neonatal and postpubertal astrocytes responded to estradiol, but there were slight differences. For example, in neonatal astrocytes, the effective concentration at 50% (EC<sub>50</sub>) of estradiol was 12.7 nM and the rise time  $21.5 \pm 3.6$  sec, whereas in postpubertal cortical astrocytes, the EC<sub>50</sub> = 15.9 nM and rise time =  $36.4 \pm 5.4$  sec. The most striking difference between the neonatal and postpubertal astrocytes in terms of  $[Ca^{2+}]_i$  was that estradiol-induced  $[Ca^{2+}]_i$  oscillations were observed only in astrocytes from postpubertal rats, and these were the astrocytes in which estradiol-induced progesterone synthesis was detected.

In peripheral steroidogenic tissues,  $[Ca^{2+}]_i$  is vital to the intracellular signaling pathways that activate steroidogenesis (25–29). We had previously demonstrated that estradiol rapidly induced  $[Ca^{2+}]_i$  spikes in cortical astrocytes (12). Although the neonatal cortical and postpubertal hypothalamic astrocytes were similar in estradiol-induced  $[Ca^{2+}]_i$  flux and their ability to synthesize progesterone, the relationship of increased  $[Ca^{2+}]_i$  had not been connected to increased progesterone synthesis until now. In the present study, we demonstrate that estradiol increases steroidogenesis that is dependent of estradiol-induced  $[Ca^{2+}]_i$ .

The estradiol action on  $[Ca^{2+}]_i$  flux was rapid ( $<2$  min), blocked by ICI 182,780 and stereospecific (17 $\alpha$ -estradiol was ineffective). As previously reported in cortical astrocytes (12), the estradiol effect was due to release of intracellular

$\text{Ca}^{2+}$  stores, as evidenced by similar responses to estradiol in standard and  $\text{Ca}^{2+}$ -free media. However, estradiol stimulated  $[\text{Ca}^{2+}]_i$  spikes were blocked when internal stores of  $\text{Ca}^{2+}$  were depleted by thapsigargin, as reported for other nonexcitable cells (30). Previous results had suggested a mechanism through which estradiol may induce progesterone synthesis in astrocytes involving the release of  $\text{IP}_3$ -sensitive  $\text{Ca}^{2+}$  stores (12). In the present study, estradiol stimulated  $[\text{Ca}^{2+}]_i$  flux and increased progesterone synthesis in postpubertal astrocytes. To determine whether increasing  $[\text{Ca}^{2+}]_i$  would stimulate progesterone synthesis, the sesquiterpene lactone, thapsigargin, was used to rapidly increase release of  $[\text{Ca}^{2+}]_i$  by releasing  $\text{Ca}^{2+}$  from intracellular stores

bypassing the  $\text{IP}_3/\text{IP}_3$  receptor mechanism (Ref. 31 and references therein). Thapsigargin caused a rapid and transient increase of  $[\text{Ca}^{2+}]_i$  (Fig. 3A). A 1-h treatment of postpubertal astrocytes with thapsigargin alone increased progesterone levels in the supernatant (Fig. 3B), which was similar to 1-h treatment with thapsigargin and estradiol. These results suggest that estradiol and thapsigargin activate the same intracellular pathway to stimulate progesterone synthesis. The idea that estradiol increased progesterone synthesis by elevating  $[\text{Ca}^{2+}]_i$  was supported by the demonstration that levels of progesterone induced by estradiol treatment for 48 h were not significantly different from those induced by the 1-h treatment with thapsigargin. It is important that after thap-

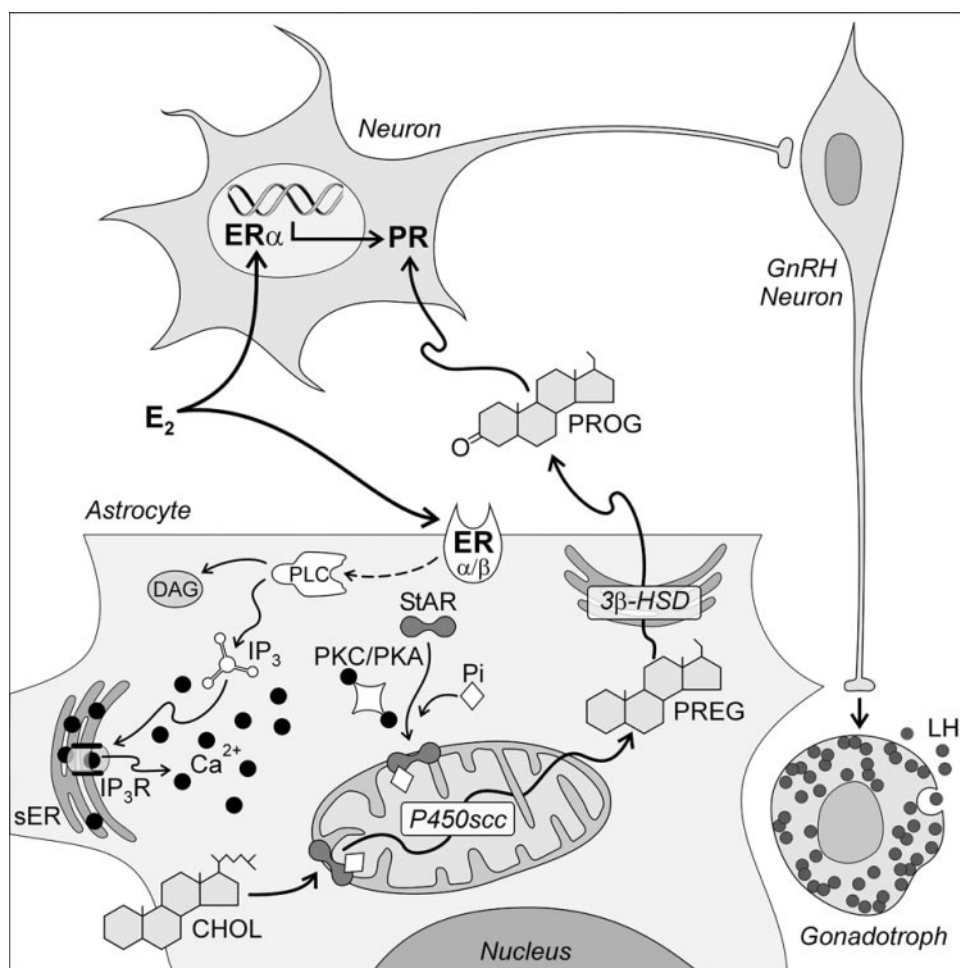

FIG. 4. A model of estradiol action on hypothalamic cells involved in the regulation of the LH surge based on present results and previous findings (3, 51, 52). Circulating estradiol acts on neurons and astrocytes. The astrocyte has been magnified to illustrate the potential intracellular pathway of membrane estradiol signaling that regulates progesterone (PROG) synthesis. Estradiol acts on membrane ERs, which have been reported in astrocyte membranes. Activated ERs increase  $[\text{Ca}^{2+}]_i$  through a PLC/ $\text{IP}_3$  receptor ( $\text{IP}_3\text{R}$ ) mechanism. The source of the elevated  $[\text{Ca}^{2+}]_i$  is the smooth endoplasmic reticulum (sER). In the present study, estradiol-induced release of  $\text{Ca}^{2+}$  was mimicked with thapsigargin. Calcium and PKA and possibly PKC phosphorylate StAR before import into the mitochondrion (*e.g.* Ref. 53). The StAR-mediated transport of cholesterol (CHOL) through the mitochondrial intermembrane space is the rate-limiting step of steroidogenesis. In the inner mitochondrial membrane, CHOL is converted to pregnenolone (PREG) by cytochrome P450scc. PREG is converted to PROG in the sER via the action of  $3\beta$ -HSD isomerase and diffuses out of the astrocyte to encounter estradiol-induced PROG receptors (PRs) in neurons. PR-expressing neurons transmit environmental and circadian signals to GnRH neurons, stimulating release at the median eminence. GnRH in turn initiates the surge release of LH from anterior pituitary gonadotrophs. Several aspects of the model remain to be determined. StAR is present in astrocytes, but the mechanism of its regulation has not been elucidated. In peripheral steroidogenic tissues, both PKA and PKC mediate StAR activation, and it is assumed to be the same in astrocytes. In addition, the localization of PR neurons that regulate GnRH neurons is thought to be along the rostral third ventricle and in the anteroventricular periventricular nucleus and rostral periventricular nucleus (54). DAG, Diacylglycerol; Pi, inorganic phosphate.



sigargin treatment and replacement of DMEM, estradiol treatment for 48 h did not significantly increase progesterone concentration in the supernatant. This is most likely due to the inability of the intracellular  $\text{Ca}^{2+}$  pools to be restored after depletion because thapsigargin poisons nonmitochondrial  $\text{Ca}^{2+}$ -ATPase pumps of  $\text{IP}_3$ -sensitive intracellular  $\text{Ca}^{2+}$  pools (32).

Whereas the present results strongly implicate a membrane ER such as was demonstrated in cortical astrocyte membranes that signals through the PLC- $\text{IP}_3$  pathway (12), the proximal signaling mechanism of this receptor remains to be elucidated. One possibility is that the membrane ER is itself a G protein-coupled receptor (GPCR) that stimulates PLC. This is a possibility; our results suggest that the membrane receptor is a classic ER, but neither  $\text{ER}\alpha$  nor  $\text{ER}\beta$  has the typical seven-membrane pass structure of known GPCRs. An alternative proposal is that membrane ERs require another protein, metabotropic glutamate receptor type 1 (mGluR1), to activate intracellular signaling pathways (33). The mGluR1 is a GPCR protein-coupled receptor that activates the PLC- $\text{IP}_3$  pathway in neurons and astrocytes (33, 34). Thus, the ER/mGluR1 complex may initiate signaling through the PLC pathway stimulating  $\text{IP}_3$  production that in turn activates  $\text{IP}_3$  receptors, causing the release of  $\text{Ca}^{2+}$  (12). This increase of  $[\text{Ca}^{2+}]_i$  could activate a protein kinase, either protein kinase A (PKA) or protein kinase C (PKC), leading to protein phosphorylation and activation of StAR, a mechanism identified for regulation of steroidogenesis (19, 35).

The idea that steroidogenesis is rapidly activated without involving gene expression is supported by quantitative RT-PCR data. Estradiol did not alter mRNA levels of proteins related to steroidogenesis. Thus, although astrocytes in culture synthesize progesterone and respond to estradiol, the mechanism may be different from that found *in vivo* in which 24 h after estradiol treatment, the expression of  $3\beta$ -HSD mRNA was increased in the hypothalamus (3). It is possible that in an enriched astrocyte culture that does not have neurons, important neuron-glia interactions are missing (36, 37). These interactions may be necessary for estradiol to increase transcription of  $3\beta$ -HSD as observed *in vitro* (3). The enriched astrocyte culture model, however, revealed an estradiol nongenomic mechanism intrinsic to astrocytes and points to questions about neural-glia interactions that require further study.

The present results suggest that in addition to an estradiol-induced increase in  $3\beta$ -HSD expression (3), estradiol also regulates progesterone synthesis through a nongenomic mechanism. For most of the estrous cycle, estradiol provides negative feedback suppressing the GnRH network, but on the afternoon of proestrus, estradiol provides positive feedback inducing the LH surge (38). Our previous studies showed that estradiol-induced increase in locally synthesized hypothalamic progesterone, neuroprogesterone, is a critical part of the positive feedback mechanism (1). We hypothesize that neuroprogesterone binds to estradiol-induced progesterone receptors, activating the GnRH network and causing the surge release of LH that is critical for ovulation (Fig. 4). The present study provides important information about the role of astrocytes in this process and demonstrates

a nongenomic estradiol action on  $[\text{Ca}^{2+}]_i$  through which progesterone synthesis is regulated.

Astrocytes have been traditionally relegated to supporting roles in the CNS. The main function of these cells was thought to be structural support and maintenance of the extracellular environment [e.g. blood brain barrier and potassium concentration (22)]. Recently it has become clear that astrocytes have important roles in brain function. Astrocytes express voltage-sensitive channels (39–41), produce  $\text{Ca}^{2+}$  waves (42) and oscillations (43), and control glutamate uptake (44). Astrocytes have been shown to modulate neural activity (45, 46), neurogenesis (47), plasticity (48), and synaptogenesis (49). In terms of neuroendocrinology, the idea that astrocytes synthesize sex steroid hormones dates back to the pioneering work of Baulieu and colleagues (50). More recently it has been postulated that among the various cells of the CNS, astrocytes preferentially synthesize and release progesterone (9), and we had demonstrated that estradiol stimulated the *de novo* synthesis of progesterone in neonatal cortical astrocytes (2) and hypothalamic astrocytes (this study).

In summary, the present results expand our understanding of peripheral estradiol regulation of neuroprogesterone synthesis. We demonstrated that estradiol can stimulate the *de novo* synthesis of progesterone in hypothalamic astrocytes and that this response is developmentally regulated: inducible in postpubertal but not neonatal cultures. Furthermore, estradiol appears to regulate progesterone synthesis via nongenomic actions through a classic ER associated with the plasma membrane that stimulates the release of  $[\text{Ca}^{2+}]_i$ , and through genomic regulation of  $3\beta$ -HSD mRNA expression (3). Both of these mechanisms appear to be important for estradiol to induce progesterone synthesis in the hypothalamus, as part of the brain mechanism responsible for initiating the estrogen-positive feedback of the LH surge.

## Acknowledgments

The authors thank Amy Christensen for her technical assistance.

Received June 12, 2006. Accepted October 31, 2006.

Address all correspondence and requests for reprints to: Paul Micevych, Ph.D., 73-078 CHS, Department of Neurobiology, David Geffen School of Medicine at University of California, Los Angeles, Los Angeles, California 90095-1763. E-mail: pmicevych@mednet.ucla.edu.

This work was supported by National Institutes of Health Grant HD 42635.

Present address for V.C.: Department of Biomedical Sciences, Charles Drew University of Medicine and Science, Los Angeles, California 90059.

Present address for K.S.: Department of Biological Sciences, California State University, Long Beach, Long Beach, California 90840.

Disclosure Statement: The authors have nothing to disclose.

## References

1. Micevych P, Sinchak K, Mills RH, Tao L, LaPolt P, Lu JK 2003 The luteinizing hormone surge is preceded by an estrogen-induced increase of hypothalamic progesterone in ovariectomized and adrenalectomized rats. *Neuroendocrinology* 78:29–35
2. Sinchak K, Mills RH, Tao L, LaPolt P, Lu JK, Micevych P 2003 Estrogen induces *de novo* progesterone synthesis in astrocytes. *Dev Neurosci* 25:343–348
3. Soma KK, Sinchak K, Lakhter A, Schlinger BA, Micevych PE 2005 Neurosteroids and female reproduction: estrogen increases  $3\beta$ -HSD mRNA and activity in rat hypothalamus. *Endocrinology* 146:4386–4390

4. Baulieu EE 1998 Neurosteroids: a novel function of the brain. *Psychoneuroendocrinology* 23:963–987
5. Mellon SH, Griffin LD, Compagnone NA 2001 Biosynthesis and action of neurosteroids. *Brain Res Brain Res Rev* 37:3–12
6. Mellon SH, Vaudry H 2001 Biosynthesis of neurosteroids and regulation of their synthesis. *Int Rev Neurobiol* 46:33–78
7. Schumacher M, Akwa Y, Guennoun R, Robert F, Labombarda F, Desarnaud F, Robel P, De Nicola AF, Baulieu EE 2000 Steroid synthesis and metabolism in the nervous system: trophic and protective effects. *J Neurocytol* 29:307–326
8. Kabbadj K, el-Etr M, Baulieu EE, Robel P 1993 Pregnenolone metabolism in rodent embryonic neurons and astrocytes. *Glia* 7:170–175
9. Zwain IH, Yen SS 1999 Neurosteroidogenesis in astrocytes, oligodendrocytes, and neurons of cerebral cortex of rat brain. *Endocrinology* 140:3843–3852
10. Coirini H, Guezou M, Liere P, Delespierre B, Pianos A, Eychenne B, Schumacher M, Guennoun R 2002  $\beta$ -Hydroxysteroid dehydrogenase expression in rat spinal cord. *Neuroscience* 113:883–891
11. Gago N, Akwa Y, Sananes N, Guennoun R, Baulieu EE, El-Etr M, Schumacher M 2001 Progesterone and the oligodendroglial lineage: stage-dependent biosynthesis and metabolism. *Glia* 36:295–308
12. Chaban VV, Lakhter AJ, Micevych P 2004 A membrane estrogen receptor mediates intracellular calcium release in astrocytes. *Endocrinology* 145:3788–3795
13. Ogi J, Sinchak K, Soma KK, Lu JKH, Micevych P, Estrogen induces progesterone synthesis in hypothalamic astrocytes through an increase of intracellular calcium levels. Proc 34th Annual Meeting of the Society for Neuroscience, San Diego, CA, 2004 (Abstract 886.7)
14. Abraham G, Manlomos F, Solis M, Garza R, Maroulis G 1975 Combined radioimmunoassay of four steroids in one ml of plasma I. Progestins. *Clin Biochem* 8:369–373
15. Lu J, Judd H 1982 Silastic implants of progesterone produce high circulating levels of both progesterone and  $20\alpha$ -hydroxyprogesterone in ovariectomized, adrenalectomized rats. *Biol Reprod* 26:385–390
16. Livak KJ, Schmittgen TD 2001 Analysis of relative gene expression data using real-time quantitative PCR and the  $2^{-\Delta\Delta C(T)}$  method. *Methods* 25:402–408
17. Petrescu AD, Gallegos AM, Okamura Y, Strauss 3rd JF, Schroeder F 2001 Steroidogenic acute regulatory protein binds cholesterol and modulates mitochondrial membrane sterol domain dynamics. *J Biol Chem* 276:36970–36982
18. Tsujishita Y, Hurley JH 2000 Structure and lipid transport mechanism of a StAR-related domain. *Nat Struct Biol* 7:408–414
19. Stocco DM, Clark BJ 1996 Regulation of the acute production of steroids in steroidogenic cells. *Endocr Rev* 17:221–244
20. Chapman JC, Waterhouse TB, Michael SD 1992 Changes in mitochondrial and microsomal  $\beta$ -hydroxysteroid dehydrogenase activity in mouse ovary over the course of the estrous cycle. *Biol Reprod* 47:992–997
21. Cherradi N, Guidicelli C, Defaye G, Chambaz EM 1992 Purification and characterization of  $\beta$ -hydroxysteroid-dehydrogenase/isomerase from bovine adrenal cortex. *J Steroid Biochem Mol Biol* 41:831–836
22. Sauer LA, Chapman JC, Dauchy RT 1994 Topology of  $\beta$ -hydroxy-5-ene-steroid dehydrogenase/ $\Delta^5$ - $\Delta^4$ -isomerase in adrenal cortex mitochondria and microsomes. *Endocrinology* 134:751–759
23. Sisk CL, Richardson HN, Chappell PE, Levine JE 2001 *In vivo* gonadotropin-releasing hormone secretion in female rats during peripubertal development and on proestrus. *Endocrinology* 142:2929–2936
24. Micevych PE, Rissman EF, Gustafsson JA, Sinchak K 2003 Estrogen receptor- $\alpha$  is required for estrogen-induced  $\mu$ -opioid receptor internalization. *J Neurosci Res* 71:802–810
25. Van der Kraak G 1991 Role of calcium in the control of steroidogenesis in preovulatory ovarian follicles of the goldfish. *Gen Comp Endocrinol* 81:268–275
26. Rossato M, Nogara A, Merico M, Ferlin A, Garolla A, Foresta C 2001 Store-operated calcium influx and stimulation of steroidogenesis in rat Leydig cells: role of  $\text{Ca}^{2+}$ -activated  $\text{K}^{+}$  channels. *Endocrinology* 142:3865–3872
27. Tsang BK, Carnegie JA 1983 Calcium requirement in the gonadotropic regulation of rat granulosa cell progesterone production. *Endocrinology* 113:763–769
28. Flores JA, Aguirre C, Sharma OP, Veldhuis JD 1998 Luteinizing hormone (LH) stimulates both intracellular calcium ion ( $[\text{Ca}^{2+}]_i$ ) mobilization and transmembrane cation influx in single ovarian (granulosa) cells: recruitment as a cellular mechanism of LH- $[\text{Ca}^{2+}]_i$  dose response. *Endocrinology* 139:3606–3612
29. Rao MC, Palfrey HC, Nash NT, Greisman A, Jayatilak PG, Gibori G 1987 Effects of estradiol on calcium-specific protein phosphorylation in the rat corpus luteum. *Endocrinology* 120:1010–1018
30. Perret S, Dockery P, Harvey BJ 2001  $17\beta$ -oestradiol stimulates capacitative  $\text{Ca}^{2+}$  entry in human endometrial cells. *Mol Cell Endocrinol* 176:77–84
31. Jackson TR, Patterson SI, Thastrup O, Hanley MR 1988 A novel tumour promoter, thapsigargin, transiently increases cytoplasmic free  $\text{Ca}^{2+}$  without generation of inositol phosphates in NG115-401L neuronal cells. *Biochem J* 253:81–86
32. Thastrup O, Cullen PJ, Drobak BK, Hanley MR, Dawson AP 1990 Thapsigargin, a tumor promoter, discharges intracellular  $\text{Ca}^{2+}$  stores by specific inhibition of the endoplasmic reticulum  $\text{Ca}^{2+}$ -ATPase. *Proc Natl Acad Sci USA* 87:2466–2470
33. Boulware MI, Weick JP, Becklund BR, Kuo SP, Groth RD, Mermelstein PG 2005 Estradiol activates group I and II metabotropic glutamate receptor signaling, leading to opposing influences on cAMP response element-binding protein. *J Neurosci* 25:5066–5078
34. Zur Nieden R, Deitmer JW 2006 The role of metabotropic glutamate receptors for the generation of calcium oscillations in rat hippocampal astrocytes in situ. *Cereb Cortex* 16:676–687
35. Stocco DM, Wang X, Jo Y, Manna PR 2005 Multiple signaling pathways regulating steroidogenesis and steroidogenic acute regulatory protein expression: more complicated than we thought. *Mol Endocrinol* 19:2647–2659
36. de Sampaio e Spohr TC, Martinez R, da Silva EF, Neto VM, Gomes FC 2002 Neuro-glia interaction effects on GFAP gene: a novel role for transforming growth factor- $\beta$ 1. *Eur J Neurosci* 16:2059–2069
37. Sepp KJ, Auld VJ 2003 Reciprocal interactions between neurons and glia are required for Drosophila peripheral nervous system development. *J Neurosci* 23:8221–8230
38. Herbison A 2006 Physiology of the gonadotropin-releasing hormone neuronal network. In: Neill J, ed. *Knobil and Neill's physiology of reproduction*. San Diego: Elsevier; 1415–1482
39. Barres BA 1991 Five electrophysiological properties of glial cells. *Ann NY Acad Sci* 633:248–254
40. Barres BA 1991 Glial ion channels. *Curr Opin Neurobiol* 1:354–359
41. MacVicar BA 1984 Voltage-dependent calcium channels in glial cells. *Science* 226:1345–1347
42. Cornell-Bell AH, Finkbeiner SM, Cooper MS, Smith SJ 1990 Glutamate induces calcium waves in cultured astrocytes: long-range glial signaling. *Science* 247:470–473
43. Tashiro A, Goldberg J, Yuste R 2002 Calcium oscillations in neocortical astrocytes under epileptiform conditions. *J Neurobiol* 50:45–55
44. Oliet SH, Piet R, Poulain DA 2001 Control of glutamate clearance and synaptic efficacy by glial coverage of neurons. *Science* 292:923–926
45. Nedergaard M 1994 Direct signaling from astrocytes to neurons in cultures of mammalian brain cells. *Science* 263:1768–1771
46. Duffy S, MacVicar BA 1999 Modulation of neuronal excitability by astrocytes. *Adv Neurol* 79:573–581
47. Barres BA 1999 A new role for glia: generation of neurons! *Cell* 97:667–670
48. Muller CM, Best J 1989 Ocular dominance plasticity in adult cat visual cortex after transplantation of cultured astrocytes. *Nature* 342:427–430
49. Ullian EM, Sapperstein SK, Christopherson KS, Barres BA 2001 Control of synapse number by glia. *Science* 291:657–661
50. Corpechot C, Robel P, Axelson M, Sjoval J, Baulieu EE 1981 Characterization and measurement of dehydroepiandrosterone sulfate in rat brain. *Proc Natl Acad Sci USA* 78:4704–4707
51. Chaban VV, Mayer EA, Ennes HS, Micevych PE 2003 Estradiol inhibits ATP-induced intracellular calcium concentration increase in dorsal root ganglia neurons. *Neuroscience* 118:941–948
52. Betancourt-Calle S, Calle RA, Isales CM, White S, Rasmussen H, Bollag WB 2001 Differential effects of agonists of aldosterone secretion on steroidogenic acute regulatory phosphorylation. *Mol Cell Endocrinol* 173:87–94
53. Jo Y, King SR, Khan SA, Stocco DM 2005 Involvement of protein kinase C and cyclic adenosine 3',5'-monophosphate-dependent kinase in steroidogenic acute regulatory protein expression and steroid biosynthesis in Leydig cells. *Biol Reprod* 73:244–255
54. Chappell PE, Levine JE 2000 Stimulation of gonadotropin-releasing hormone surges by estrogen. I. Role of hypothalamic progesterone receptors. *Endocrinology* 141:1477–1485
55. McCarthy KD, de Vellis J 1980 Preparation of separate astroglial and oligodendroglial cell cultures from rat cerebral tissue. *J Cell Biol* 85:890–902
